# Supplementary material for: Multiple anti-counterfeiting realized in NaBaScSi2O7 with a single activator of Eu2+
Source: Royal Society of Chemistry journal article supplement (doi:10.1039/c8tc04018d), 2018-01-01
Supplement: c8tc04018d1.pdf [file c8tc04018d1.pdf]

## Supporting information

### Multiple Anti-counterfeiting Realized in NaBaScSi<sub>2</sub>O<sub>7</sub> with A Single Activator of Eu<sup>2+</sup>

Zhichao Liu<sup>a</sup>, Lei Zhao<sup>b</sup>, Wenbo Chen<sup>c\*</sup>, Xiaotong Fan<sup>a</sup>, Xiuxia Yang<sup>a</sup>, Shuyu Tian<sup>a</sup>, Xue Yu<sup>a</sup>, Jianbei Qiu<sup>a\*</sup> and

Xuhui Xu<sup>a\*</sup>

<sup>a</sup> College of Materials Science and Engineering, Kunming University of Science and Technology, Kunming 650093,

*P. R. China*

<sup>b</sup> School of Physics and Opto-Electronic Technology, Baoji University of Arts and Sciences, Baoji 721016,

*Shaanxi, People's Republic of China*

<sup>c</sup> Engineering Research Center of New Energy Storage Devices and Applications, Chongqing University of Arts

*and Sciences, Chongqing, 402160, P. R. China*

*Corresponding Author: Xuhui Xu E-mails: xuxuh07@126.com*

*Xue Yu E-mails: yuyu6593@126.com*

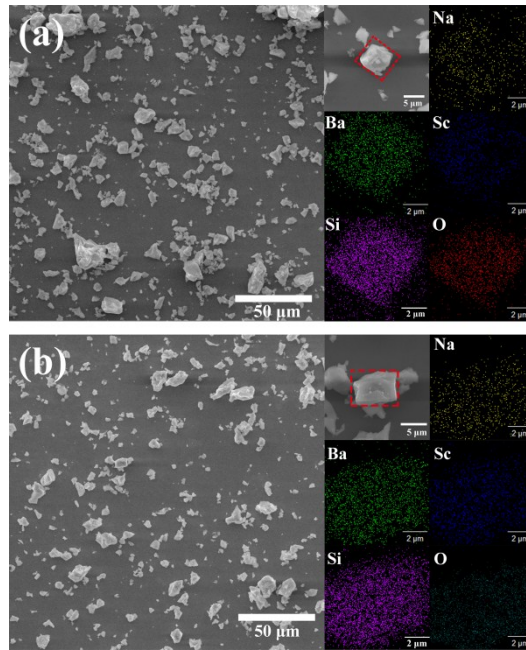

Fig. S1 SEM images microcrystal particles, the enlarged single particle, EDS elemental mapping of the  $\text{NaBa}_{0.975}\text{ScSi}_2\text{O}_7: 0.015\text{Eu}^{2+}, 0.01\text{Nd}^{3+}$ ; (b)  $\text{NaBa}_{0.9725}\text{ScSi}_2\text{O}_7: 0.015\text{Eu}^{2+}, 0.0125\text{Pr}^{3+}$  for different elements.

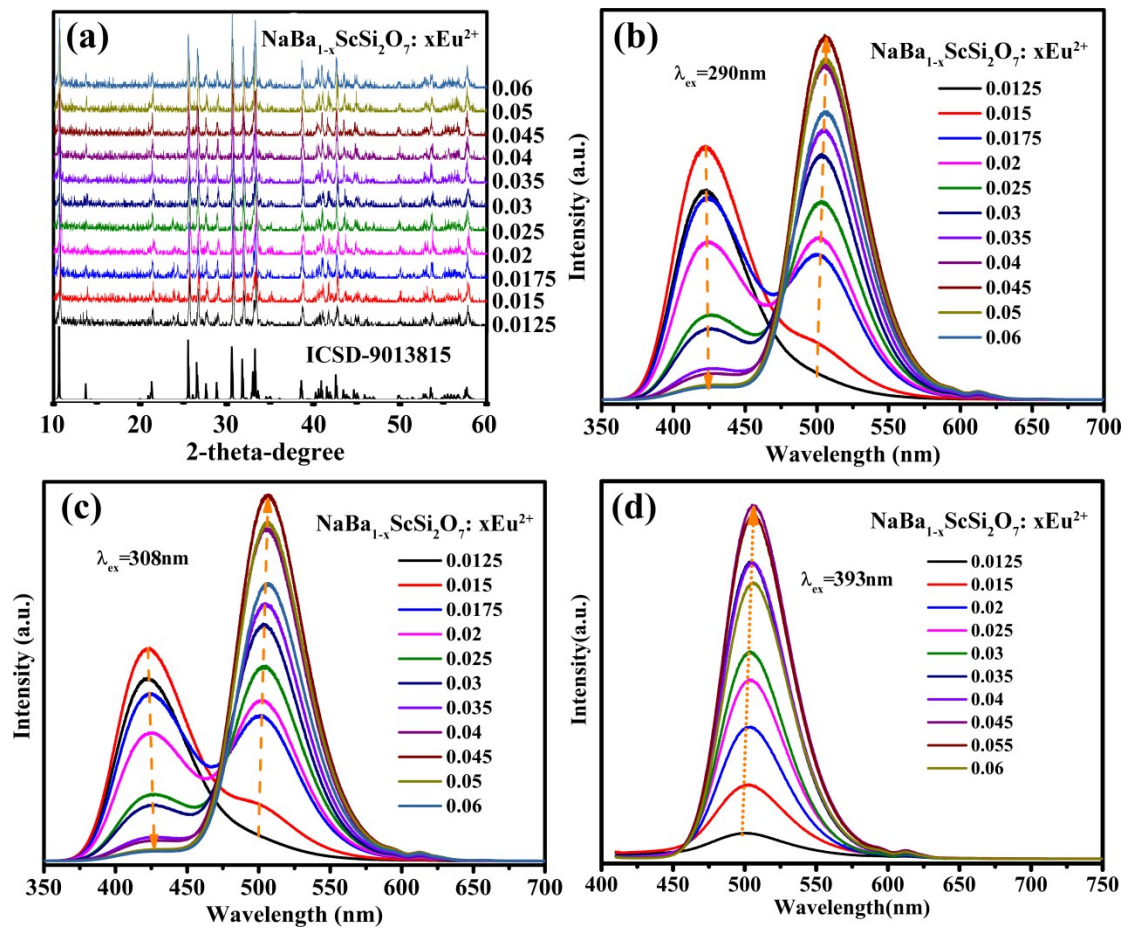

Fig. S2 SEM images microcrystal particles, the enlarged single particle and EDS elemental mapping for different elements of the  $\text{NaBa}_{0.975}\text{ScSi}_2\text{O}_7: 0.015\text{Eu}^{2+}, 0.01\text{Nd}^{3+}$ ; (b)  $\text{NaBa}_{0.9725}\text{ScSi}_2\text{O}_7: 0.015\text{Eu}^{2+}, 0.0125\text{Pr}^{3+}$ .

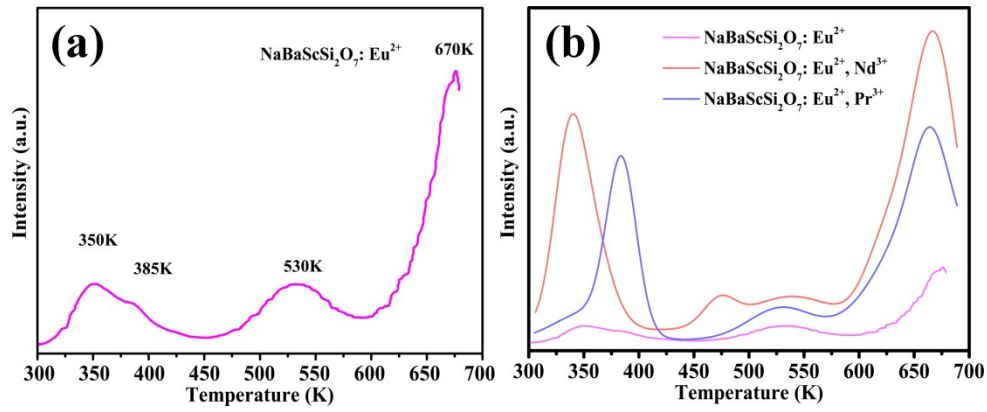

Fig. S3 TL curve of NaBa<sub>0.98</sub>ScSi<sub>2</sub>O<sub>7</sub>: 0.02Eu<sup>2+</sup> (a); and TL curves of NaBaScSi<sub>2</sub>O<sub>7</sub>: Eu<sup>2+</sup>, NaBaScSi<sub>2</sub>O<sub>7</sub>: Eu<sup>2+</sup>, Nd<sup>3+</sup>, NaBaScSi<sub>2</sub>O<sub>7</sub>: Eu<sup>2+</sup>, Pr<sup>3+</sup> (b).

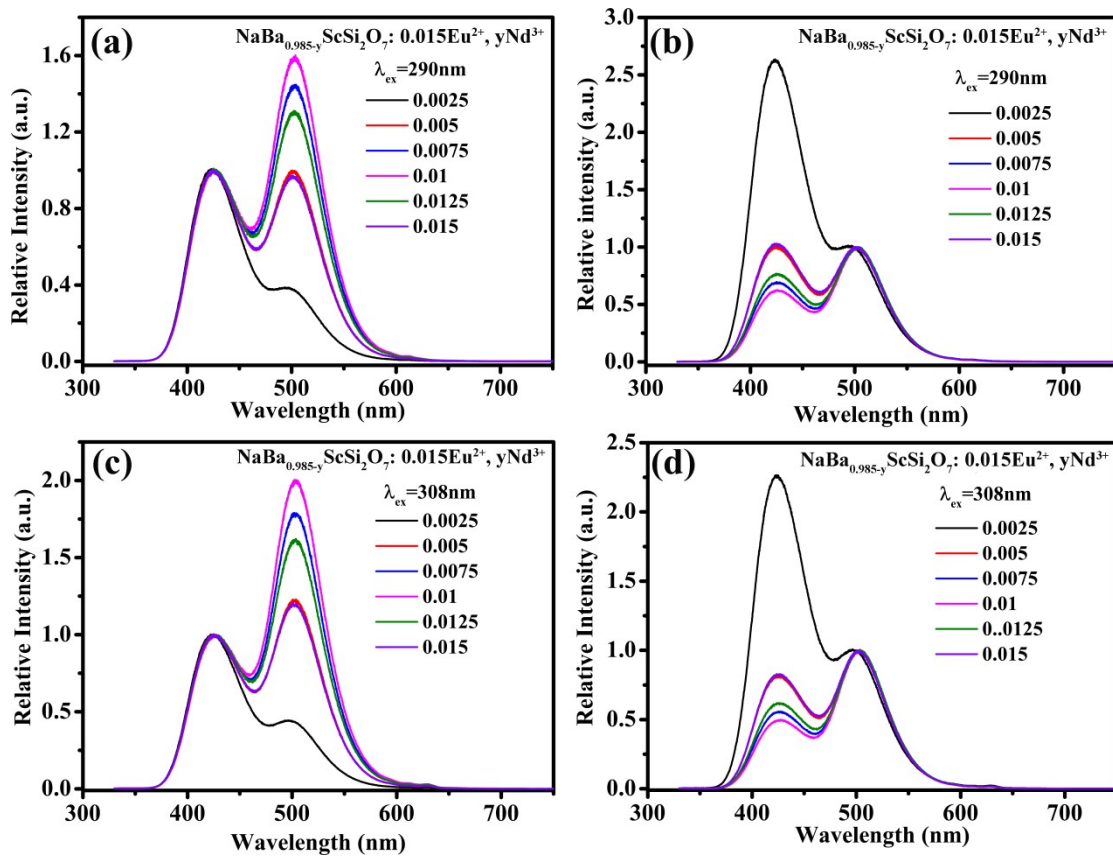

Fig. S4 PL spectra with normalized blue emission (a, c) and normalized green emission (b, d) of NaBa<sub>0.985-y</sub>ScSi<sub>2</sub>O<sub>7</sub>: 0.015Eu<sup>2+</sup>, yNd<sup>3+</sup> phosphors under the excitation of 290 and 308 nm, respectively.

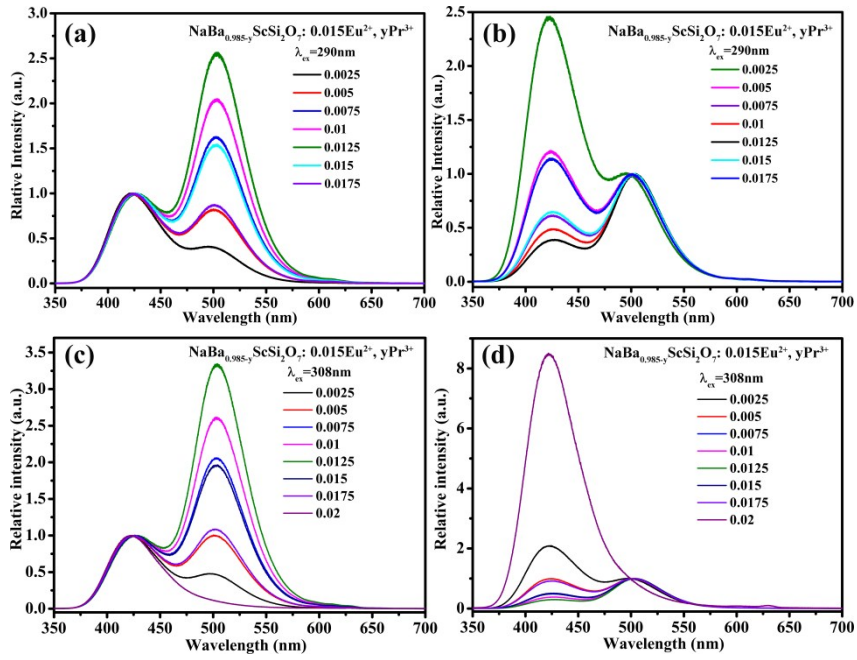

Fig. S5 PL spectra with normalized blue emission (a, c) and normalized green emission (b, d) of  $\text{NaBa}_{0.985-y}\text{ScSi}_2\text{O}_7: 0.015\text{Eu}^{2+}, y\text{Pr}^{3+}$  phosphors under the excitation of 290 and 308 nm, respectively.

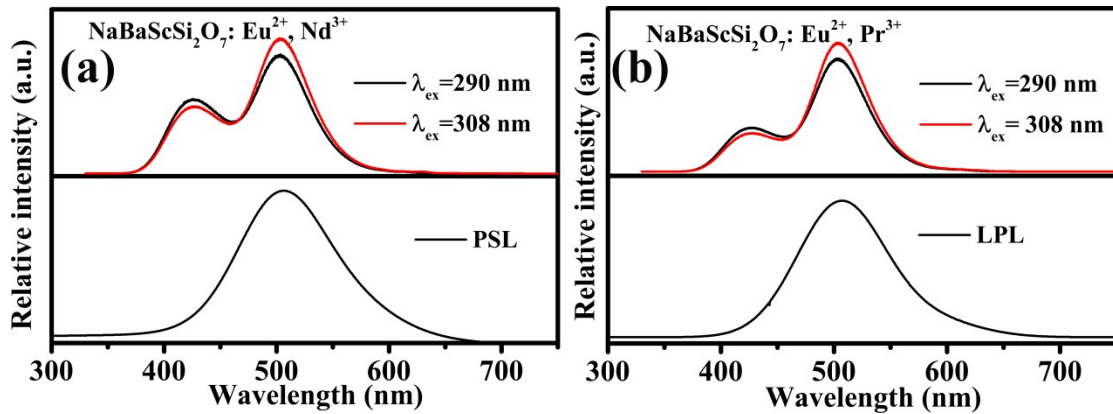

Fig. S6 PL, PSL spectra of  $\text{NaBaScSi}_2\text{O}_7: \text{Eu}^{2+}, \text{Nd}^{3+}$  (a); and PL, LPL spectra of  $\text{NaBa}_{0.9725}\text{ScSi}_2\text{O}_7: 0.015\text{Eu}^{2+}, 0.0125\text{Pr}^{3+}$  (b).

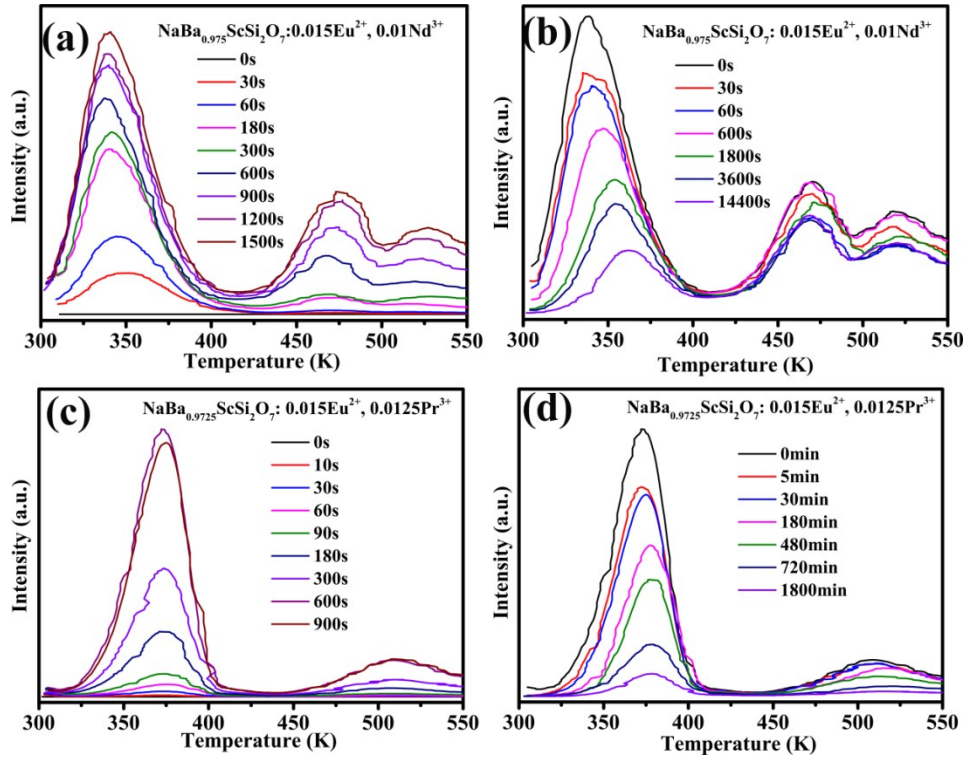

Fig. S7 TL curves of NaBa<sub>0.975</sub>ScSi<sub>2</sub>O<sub>7</sub>: 0.015Eu<sup>2+</sup>, 0.01Nd<sup>3+</sup> (a) and NaBa<sub>0.9725</sub>ScSi<sub>2</sub>O<sub>7</sub>: 0.015Eu<sup>2+</sup>, 0.0125Pr<sup>3+</sup> (c) under 254 and 365 nm excitation with different irradiation time; TL decay curves of NaBa<sub>0.975</sub>ScSi<sub>2</sub>O<sub>7</sub>: 0.015Eu<sup>2+</sup>, 0.01Nd<sup>3+</sup> (b) and NaBa<sub>0.9725</sub>ScSi<sub>2</sub>O<sub>7</sub>: 0.015Eu<sup>2+</sup>, 0.0125Pr<sup>3+</sup> (d).

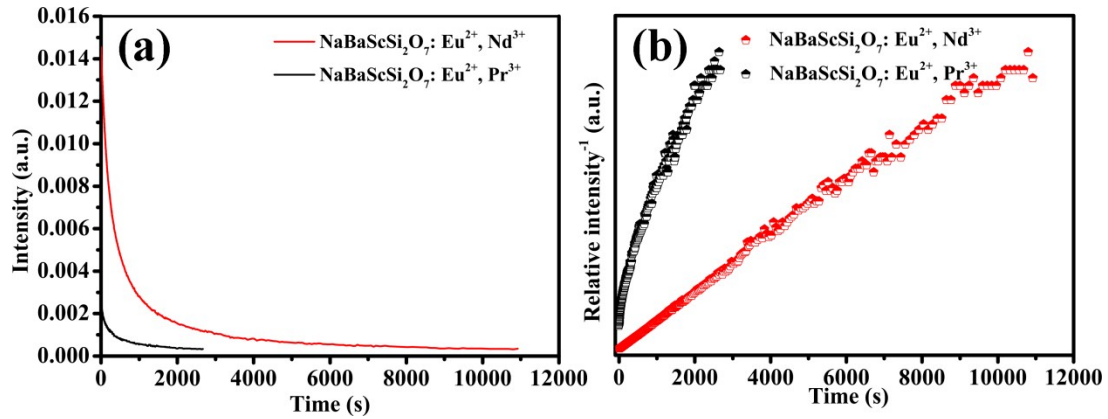

Fig. S8 Persistent decay curves (a) and Time dependence of the reciprocal of the persistent luminescence intensity (b) of NaBa<sub>0.975</sub>ScSi<sub>2</sub>O<sub>7</sub>: 0.015Eu<sup>2+</sup>, 0.01Nd<sup>3+</sup> and NaBa<sub>0.9725</sub>ScSi<sub>2</sub>O<sub>7</sub>: 0.015Eu<sup>2+</sup>, 0.0125Pr<sup>3+</sup> after UV light (254 and 365 nm) irradiation for 20 min.

Table S1. The lifetimes of NaBa<sub>1-x</sub>ScSi<sub>2</sub>O<sub>7</sub>: xEu<sup>2+</sup> phosphors.

| x              | 0.015         | 0.02          | 0.03          | 0.04          | 0.045         | 0.05          |
|----------------|---------------|---------------|---------------|---------------|---------------|---------------|
| $\tau$ (421nm) | 4.577 $\mu$ s | 4.312 $\mu$ s | 4.211 $\mu$ s | 4.119 $\mu$ s | 3.940 $\mu$ s | 3.719 $\mu$ s |
| $\tau$ (500nm) | 3.151 $\mu$ s | 4.216 $\mu$ s | 4.477 $\mu$ s | 4.715 $\mu$ s | 4.781 $\mu$ s | 4.839 $\mu$ s |
